# Supplementary material for: Automated salting-out assisted single-phase liquid–liquid extraction of Cr(vi) from river water samples prior to its atomic absorption spectrometric determination
Source: Royal Society of Chemistry journal article supplement (doi:10.1039/d3ja00426k), 2024-01-01
Supplement: d3ja00426k1.pdf [file d3ja00426k1.pdf]

## Electronic Supplementary Information

### Automated salting-out assisted single-phase liquid-liquid extraction of Cr(VI) from river water samples prior to its atomic absorption spectrometric determination

*Francisco Antonio S. Cunha<sup>a\*</sup>, Julys Pablo A. Fernandes<sup>b</sup>, Wellington S. Lyra<sup>b</sup>, Amalia Geiza.*

*G. Pessoa<sup>c</sup>, Josué C. C. Santos<sup>d</sup>, Mario C. U. Araújo<sup>b</sup>, Luciano F. Almeida<sup>b</sup>*

<sup>a</sup> Universidade Federal da Bahia, Instituto de Química, *Campus Ondina*, Zip Code 40170-115, Salvador, BA, Brazil.

<sup>b</sup> Universidade Federal da Paraíba, Centro de Ciências Exatas e da Natureza, *Campus I*, Zip Code 58051-970, João Pessoa, PB, Brazil.

<sup>c</sup> Universidade Federal da Paraíba, Centro de Biotecnologia, *Campus I*, Zip Code 58051-970, João Pessoa, PB, Brazil.

<sup>d</sup> Universidade Federal de Alagoas, Instituto de Química e Biotecnologia, *Campus A. C. Simões*, Zip Code 57072-970, Maceió, AL, Brazil.

\*Corresponding Author

E-mail: francisco.cunha@ufba.br

Phone: +55 71 996085374

**Table S1.** Electrothermal heating program for the determination of Cr(VI) in river samples.

| Temperature (°C) | Time(s) | Heating Mode   | Flow gas |
|------------------|---------|----------------|----------|
| 150              | 20      | Ramp           | ON       |
| 250              | 10      | Ramp           | ON       |
| 900              | 10      | Ramp           | ON       |
| 950              | 10      | Step           | ON       |
| 950              | 3       | Step           | ON       |
| 2300             | 2       | Step (measure) | OFF      |
| 2500             | 2       | Step           | ON       |

**Table S2.** The channel flow equations.

| Channel         | Equation               | R <sup>2</sup> |
|-----------------|------------------------|----------------|
| Saline solution | $v = 0.0661t + 0.0021$ | 0.9997         |
| Sample          | $v = 0.0667t + 0.0039$ | 0.9997         |
| Buffer          | $v = 0.0679t + 0.0002$ | 0.9992         |
| NaDDTC          | $v = 0.0616t + 0.0002$ | 0.9992         |
| Amyl alcohol    | $v = 0.0633t + 0.0146$ | 0.9987         |

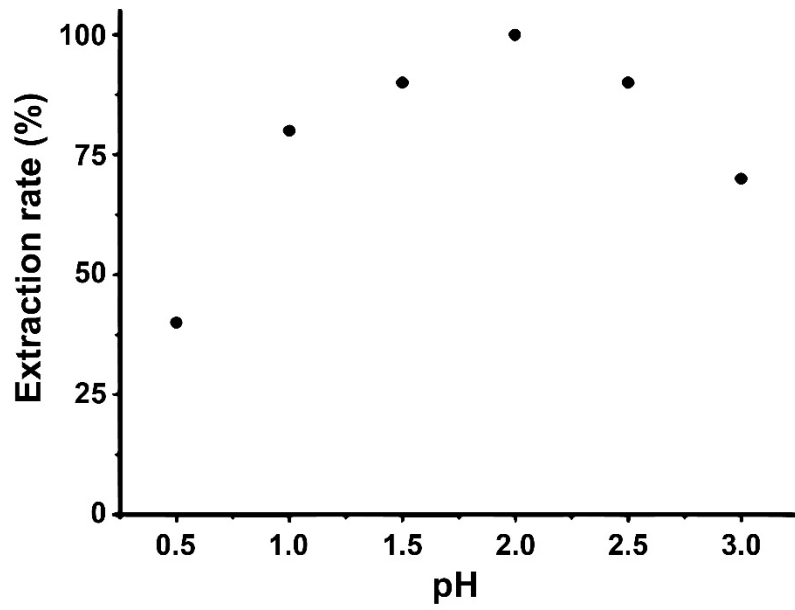

Fig. S1. Influence of pH on the extraction rate of Cr(VI)-DDTC complex.

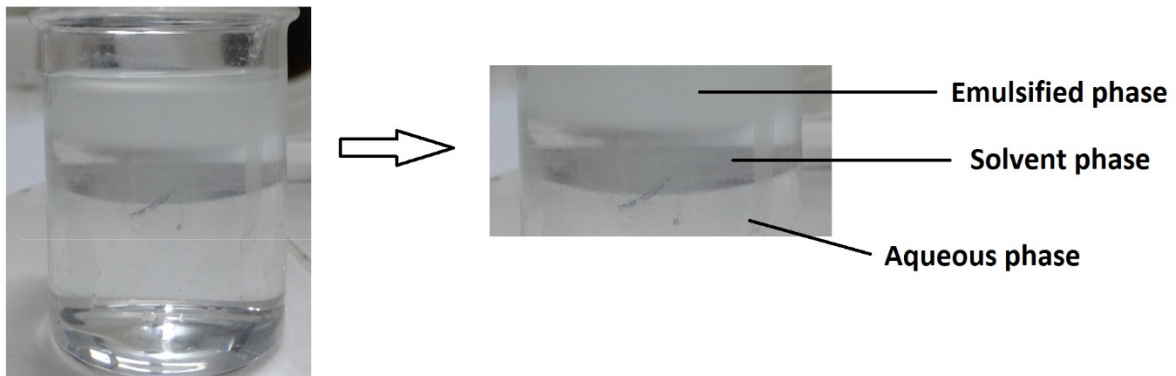

Fig. S2. Photograph of three-phase system formation after single-phase breakdown.

**Table S3.** ANOVA for the fit to a linear model of the analytical curve.

| Source      | Square Sum (SS)     | Degrees of Freedom (DF) | Mean Square (MS)    |
|-------------|---------------------|-------------------------|---------------------|
| Regression  | $2.9 \cdot 10^{-2}$ | 1                       | $2.9 \cdot 10^{-2}$ |
| Residual    | $3.3 \cdot 10^{-3}$ | 13                      | $2.5 \cdot 10^{-4}$ |
| Lack of fit | $7.7 \cdot 10^{-4}$ | 3                       | $2.6 \cdot 10^{-4}$ |
| Pure error  | $2.5 \cdot 10^{-3}$ | 10                      | $2.5 \cdot 10^{-4}$ |

**Table S4.** Extraction of Cr(VI) in the presence of different concentrations of Cr(III) at pH 2.

| Cr(VI) present ( $\mu\text{gL}^{-1}$ ) | Cr(III) added ( $\mu\text{gL}^{-1}$ ) | Cr (VI) Recovery rate (%) |
|----------------------------------------|---------------------------------------|---------------------------|
|                                        | 1.0                                   | 100                       |
| 1.0                                    | 5.0                                   | 99                        |
|                                        | 10                                    | 101                       |
